# Supplementary material
Source: PubMed Central journal article supplement (PMC3735916)

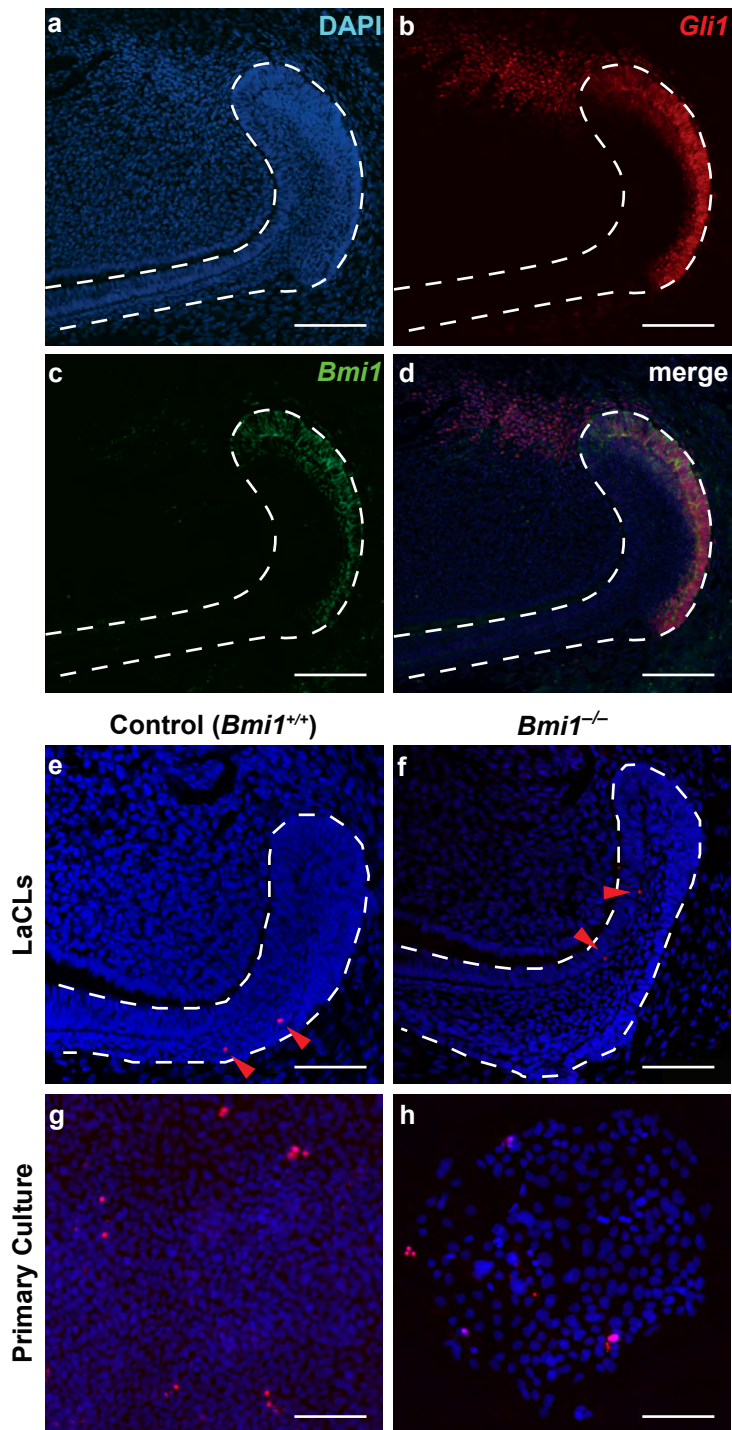

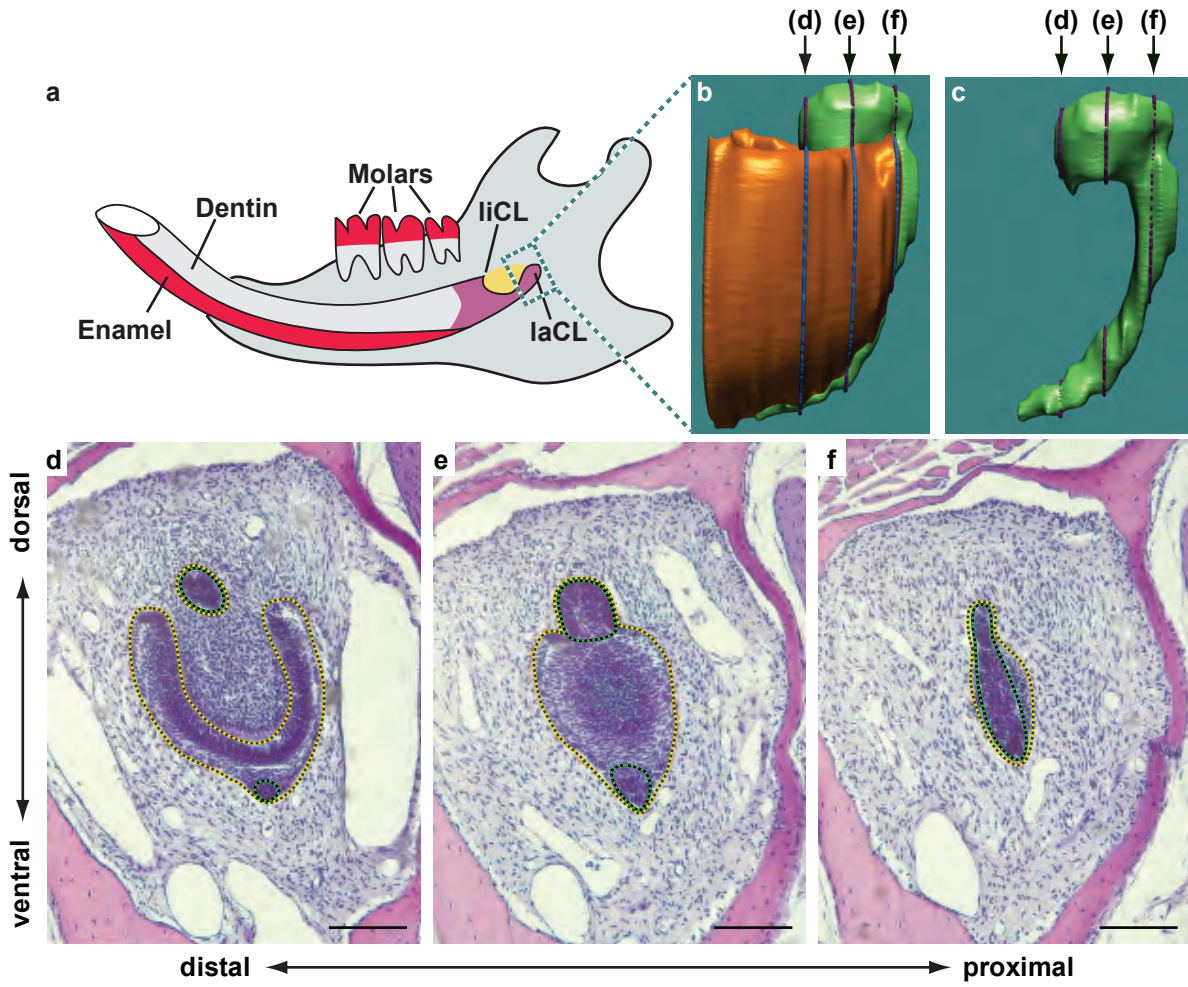

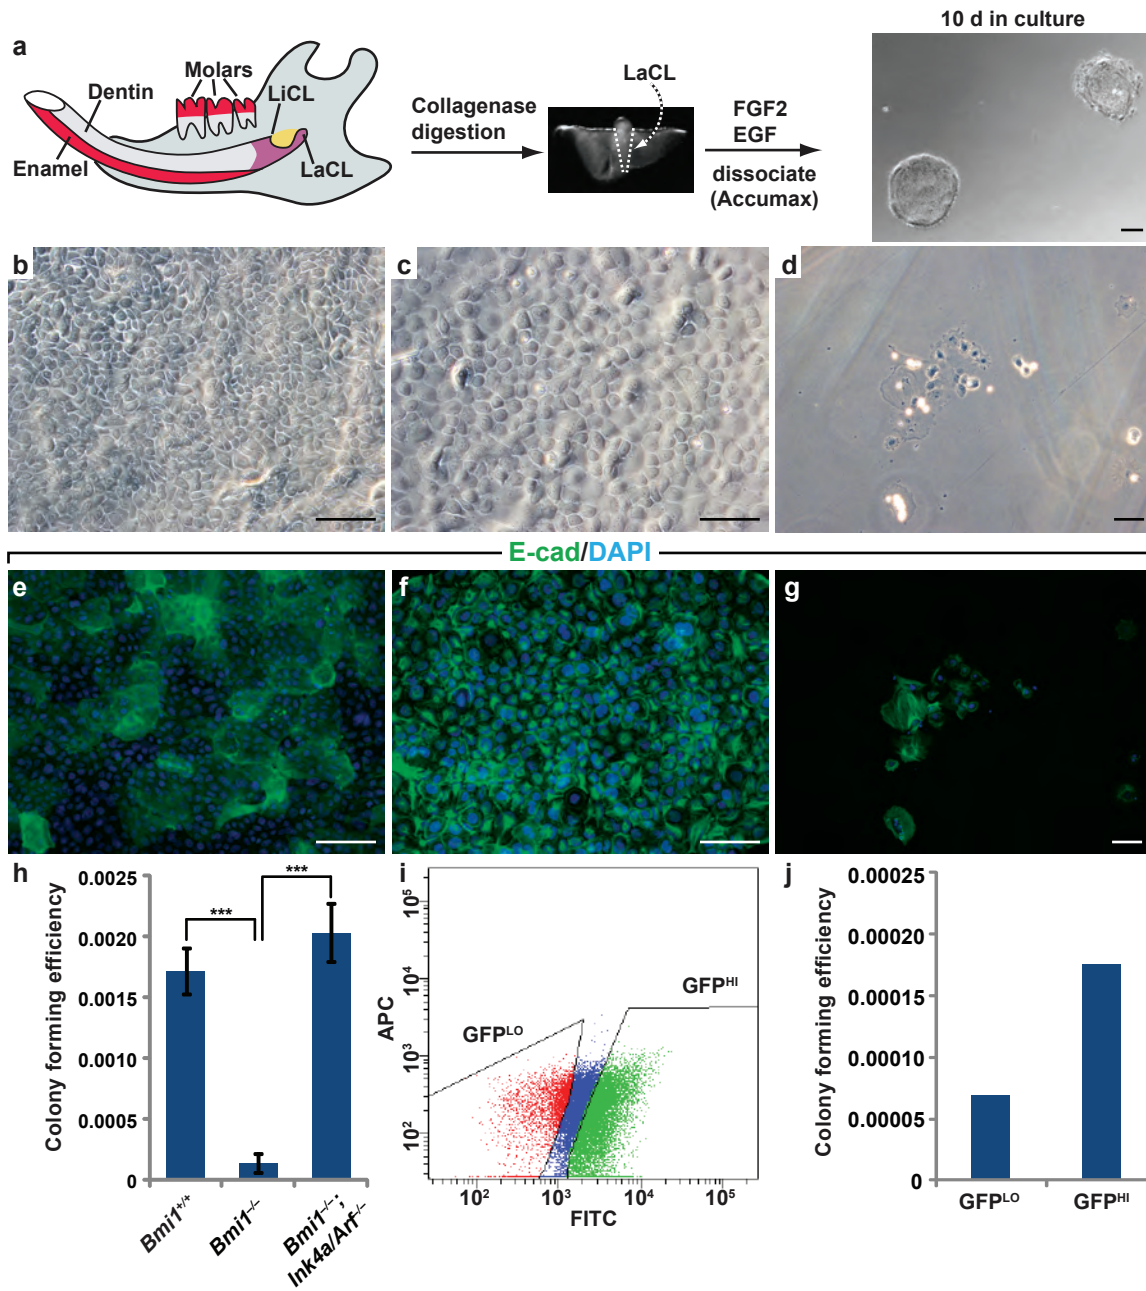

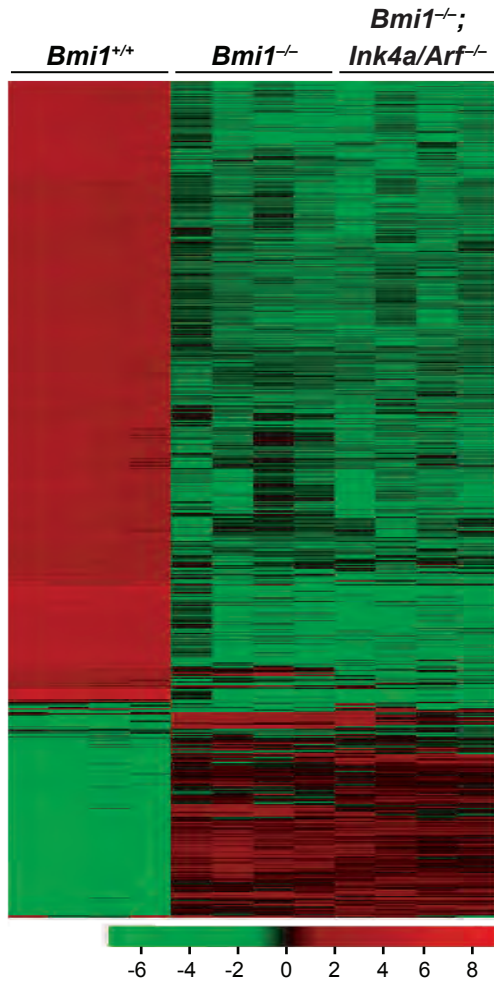

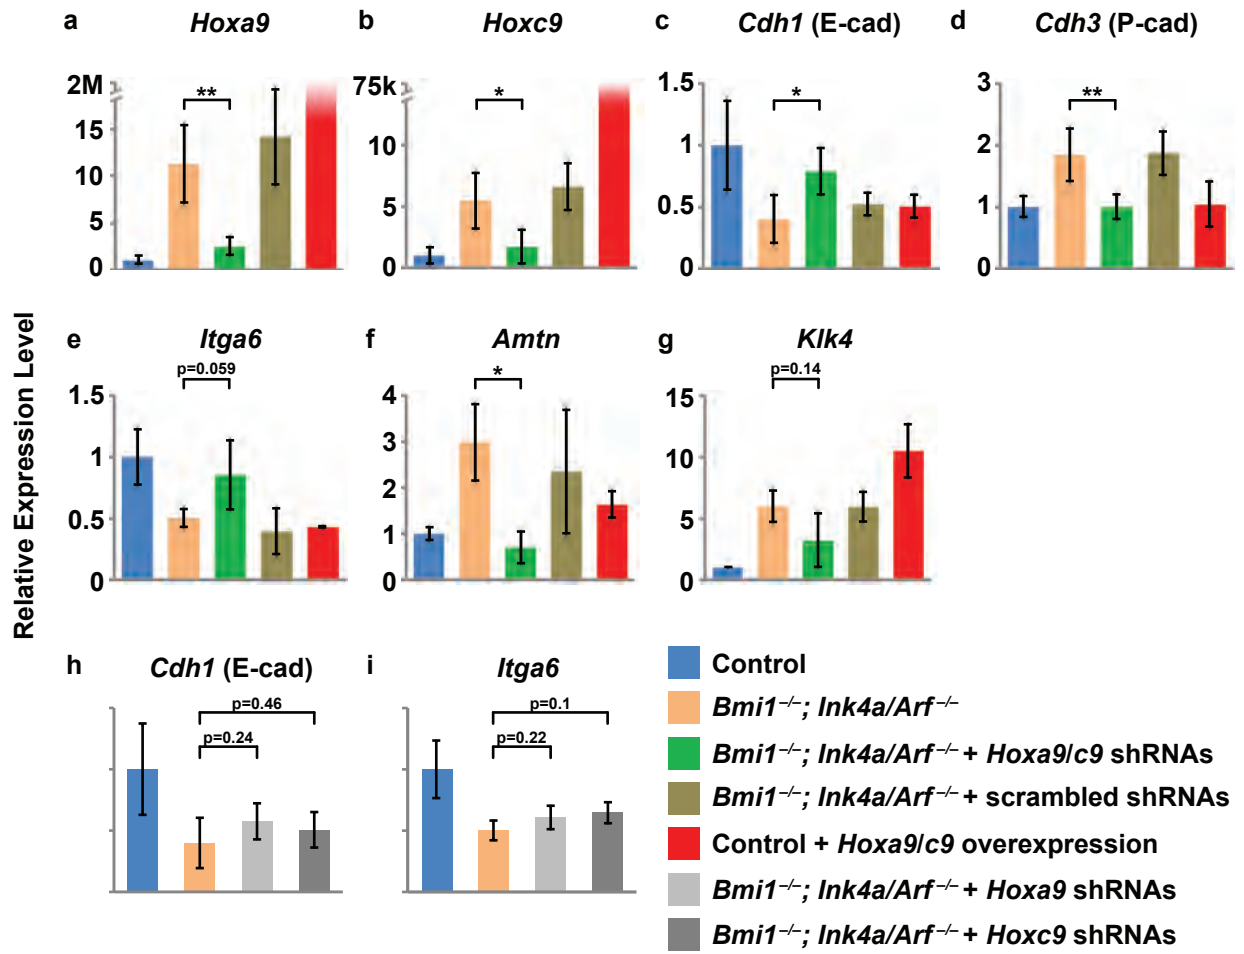

Supplement: NIHMS495813-supplement-2.pdf [file NIHMS495813-supplement-2.pdf]
